# Supplementary material
Source: publisher figshare collection journal article supplement (https://acs.figshare.com/ndownloader/files/14530691)
Supplement: Supplementary file 1 [file 14530691]

**RIFAMPICIN NANOFORMULATION ENHANCES TREATMENT OF  
TUBERCULOSIS IN ZEBRAFISH**

Jiří Trousil<sup>1, 2\*</sup>, Zdeňka Syrová<sup>3</sup>, Nils-Jørgen Knudsen Dal<sup>4</sup>, Dmytro Rak<sup>5</sup>, Rafał Konefal<sup>1</sup>, Ewa Pavlova<sup>1</sup>, Jana Matějková<sup>6</sup>, Dušan Cmarko<sup>3</sup>, Pavla Kubíčková<sup>7</sup>, Oto Pavliš<sup>7</sup>, Tomáš Urbánek<sup>1</sup>, Marián Sedlák<sup>5</sup>, Federico Fenaroli<sup>4</sup>, Ivan Raška<sup>3</sup>, Petr Štěpánek<sup>1</sup>, Martin Hrubý<sup>1\*</sup>

<sup>1</sup> *Institute of Macromolecular Chemistry of the Academy of Sciences of the Czech Republic, Heyrovského náměstí 2, 162 00 Prague 6, Czech Republic*

<sup>2</sup> *Department of Analytical Chemistry, Charles University, Faculty of Science, Hlavova 8, 128 43 Prague 2, Czech Republic*

<sup>3</sup> *Institute of Biology and Medical Genetics, First Faculty of Medicine, Charles University and General University Hospital in Prague, Albertov 4, 128 00 Prague 2, Czech Republic*

<sup>4</sup> *Department of Biosciences, University of Oslo, Blindernveien 31, 0371 Oslo, Norway*

<sup>5</sup> *Institute of Experimental Physics, Slovak Academy of Sciences, Watsonova 47, 040 01 Košice, Slovakia*

<sup>6</sup> *Department of Medical Microbiology, Second Faculty of Medicine, Charles University and Motol University Hospital, V Úvalu 84, 150 06 Prague 5, Czech Republic*

<sup>7</sup> *Center of Biological Defense, Military Health Institute, Military Medical Agency, 561 66 Těchonín, Czech Republic*

\* Corresponding authors: M.H. (mhruby@centrum.cz), J.T. (jiri.trousil@centrum.cz)

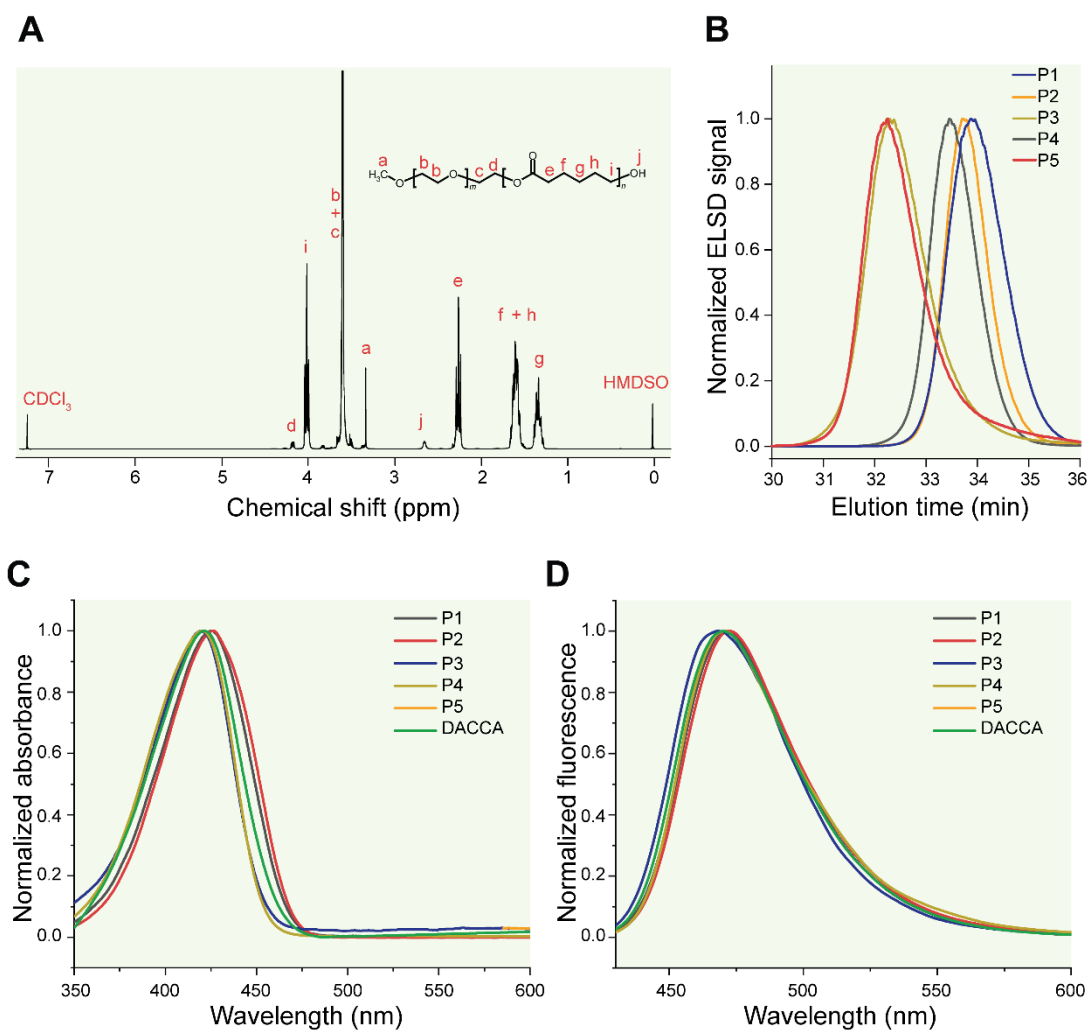

**Figure S1.** Physico-chemical characterization of prepared MPEO-*b*-PCL copolymers. (A) Typical <sup>1</sup>H NMR spectrum. Sample MPEO<sub>44</sub>-*b*-PCL<sub>18</sub> (**P1**) is shown. (B) GPC curves of prepared copolymers (**P1**, MPEO<sub>44</sub>-*b*-PCL<sub>18</sub>; **P2**, MPEO<sub>44</sub>-*b*-PCL<sub>27</sub>; **P3**, MPEO<sub>44</sub>-*b*-PCL<sub>81</sub>; **P4**, MPEO<sub>113</sub>-*b*-PCL<sub>33</sub>; **P5**, MPEO<sub>113</sub>-*b*-PCL<sub>113</sub>). (C) Normalized absorption spectra of DACCA-labelled copolymers (**P1–P5**) and free DACCA in DMSO. (D) Normalized fluorescence emission spectra of DACCA-labelled copolymers (**P1–P5**) in DMSO (excited at 420 nm).

**Table SI.** Chemical and molecular weight characterization of MPEO-*b*-PCL copolymers and DACCA content determination.

| <b>Copolymer<br/>(No.)</b>                                            | <b><sup>1</sup>H NMR<br/><i>M<sub>n</sub></i></b> | <b>GPC<sup>b</sup><br/><i>M<sub>w</sub></i></b> | <b><i>M<sub>n</sub></i></b> | <b><i>Đ</i><sup>c</sup></b> | <b>CAC<sup>d</sup><br/>(μg/mL)</b> | <b>DACCA<sup>e</sup><br/>(μg/mg)</b> |
|-----------------------------------------------------------------------|---------------------------------------------------|-------------------------------------------------|-----------------------------|-----------------------------|------------------------------------|--------------------------------------|
| MPEO <sub>44</sub> - <i>b</i> -PCL <sub>18</sub> <sup>a</sup><br>(P1) | 4 000                                             | 6 400                                           | 5 500                       | 1.17                        | 8.7                                | 51                                   |
| MPEO <sub>44</sub> - <i>b</i> -PCL <sub>27</sub><br>(P2)              | 5 000                                             | 6 700                                           | 5 400                       | 1.23                        | 5.1                                | 46                                   |
| MPEO <sub>44</sub> - <i>b</i> -PCL <sub>81</sub><br>(P3)              | 11 200                                            | 18 300                                          | 15 200                      | 1.21                        | 9.1                                | 20                                   |
| MPEO <sub>113</sub> - <i>b</i> -PCL <sub>33</sub><br>(P4)             | 8 800                                             | 8 300                                           | 7 200                       | 1.16                        | 17.7                               | 26                                   |
| MPEO <sub>113</sub> - <i>b</i> -PCL <sub>113</sub><br>(P5)            | 17 900                                            | 19 200                                          | 16 000                      | 1.19                        | 8.7                                | 12                                   |

<sup>a</sup> Subscript means the repeating units of the block polymer calculated by <sup>1</sup>H NMR.

<sup>b</sup> Values were determined by GPC calibrated with polystyrene standards.

<sup>c</sup> Dispersity, *M<sub>w</sub>*/*M<sub>n</sub>*

<sup>d</sup> Critical aggregation concentrations were determined at room temperature in water.

<sup>e</sup> When DACCA-labelled copolymers were used, the content of DACCA was determined by way of UV/VIS spectroscopy.

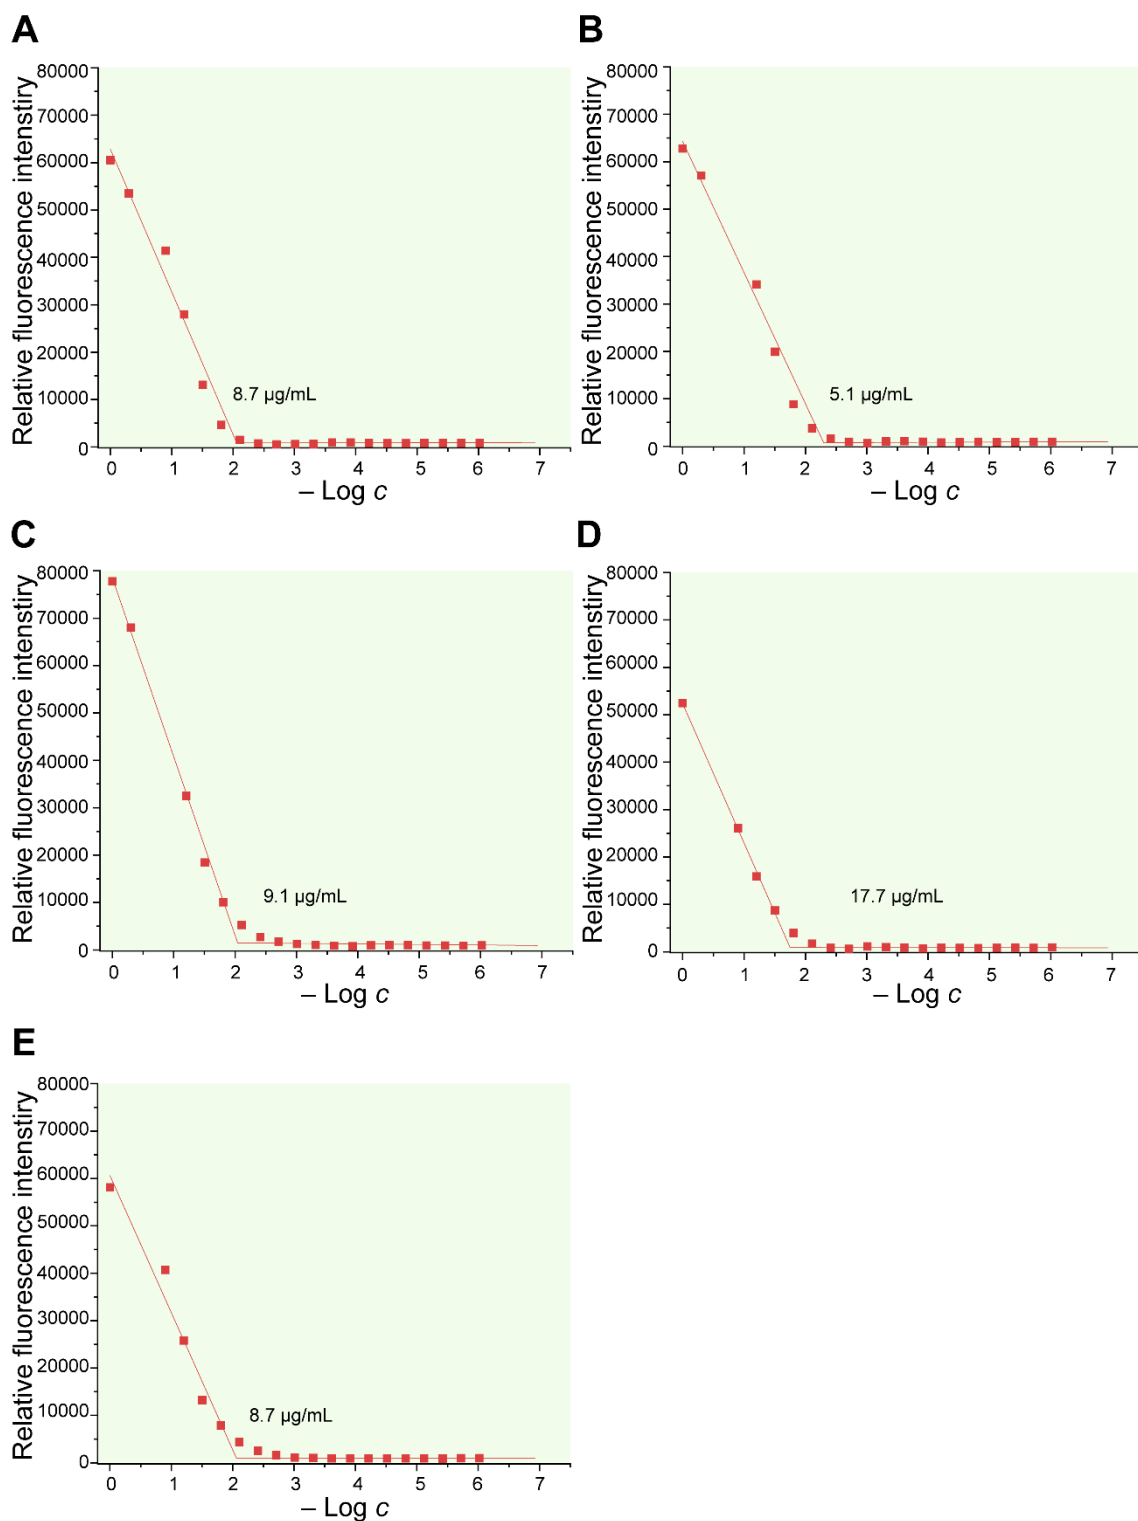

**Figure S2.** CAC curves found for (A) P1, (B) P2, (C) P3, (D) P4, and (E) P5 copolymers using Nile red as a fluorescent probe. Relative fluorescence intensities at 650 nm as a function of the concentration of MPEO-*b*-PCL NPs are shown.

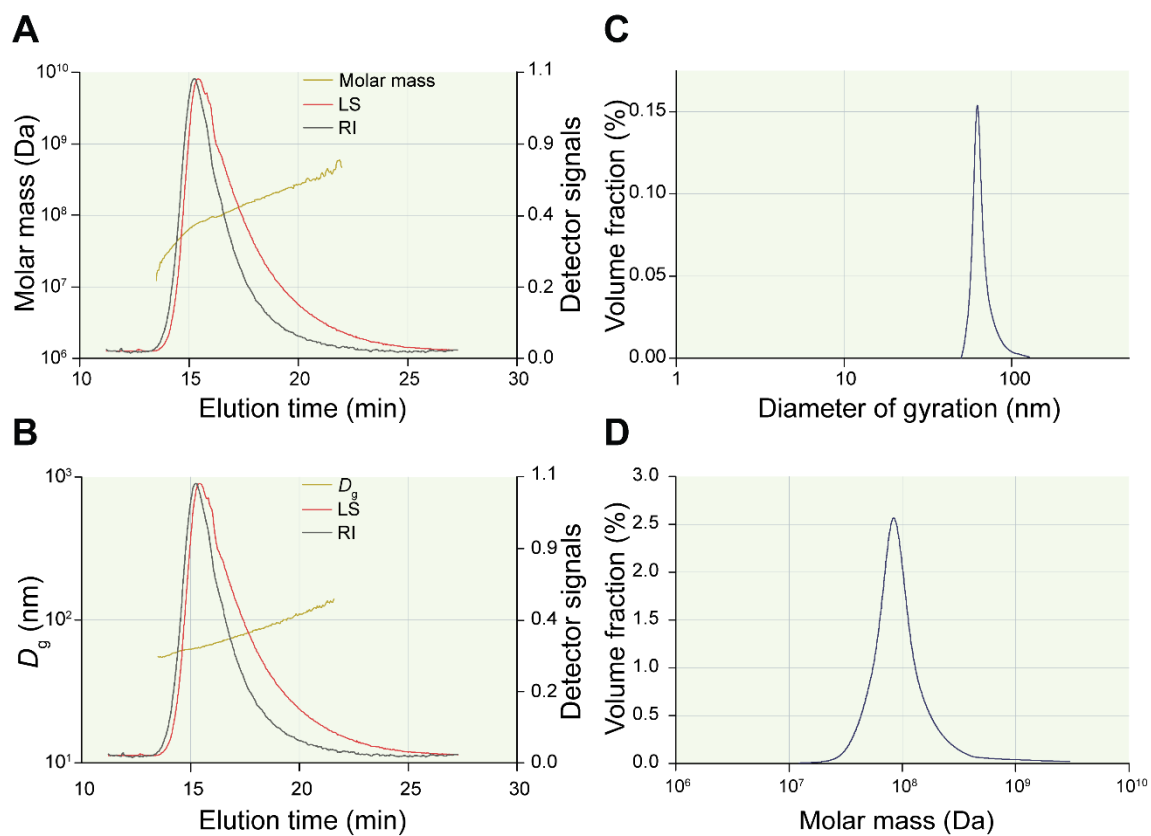

**Figure S3.** Results from AFFFF analysis of chosen MPEO-*b*-PCL formulation. MPEO<sub>44</sub>-*b*-PCL<sub>81</sub>-related elugrams with associated molar mass (A) and diameter of gyration (B); corresponding size (C) and molar mass (D) volume-weighted distribution functions.

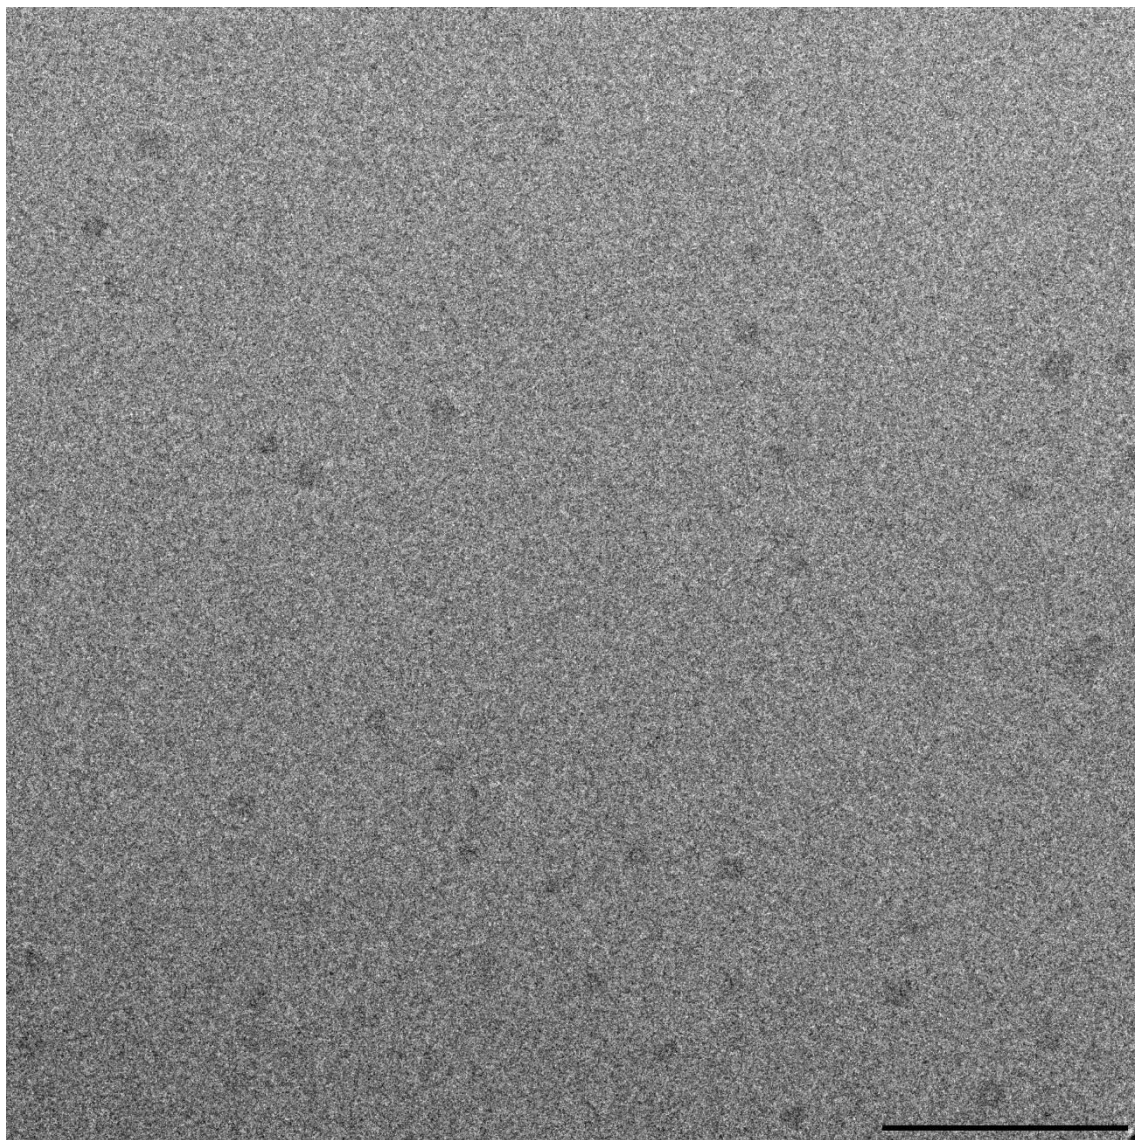

**Figure S4.** Cryo-TEM image of blank NPs based on MPEO<sub>44</sub>-*b*-PCL<sub>18</sub> (**P1**). Scale bar: 100 nm.

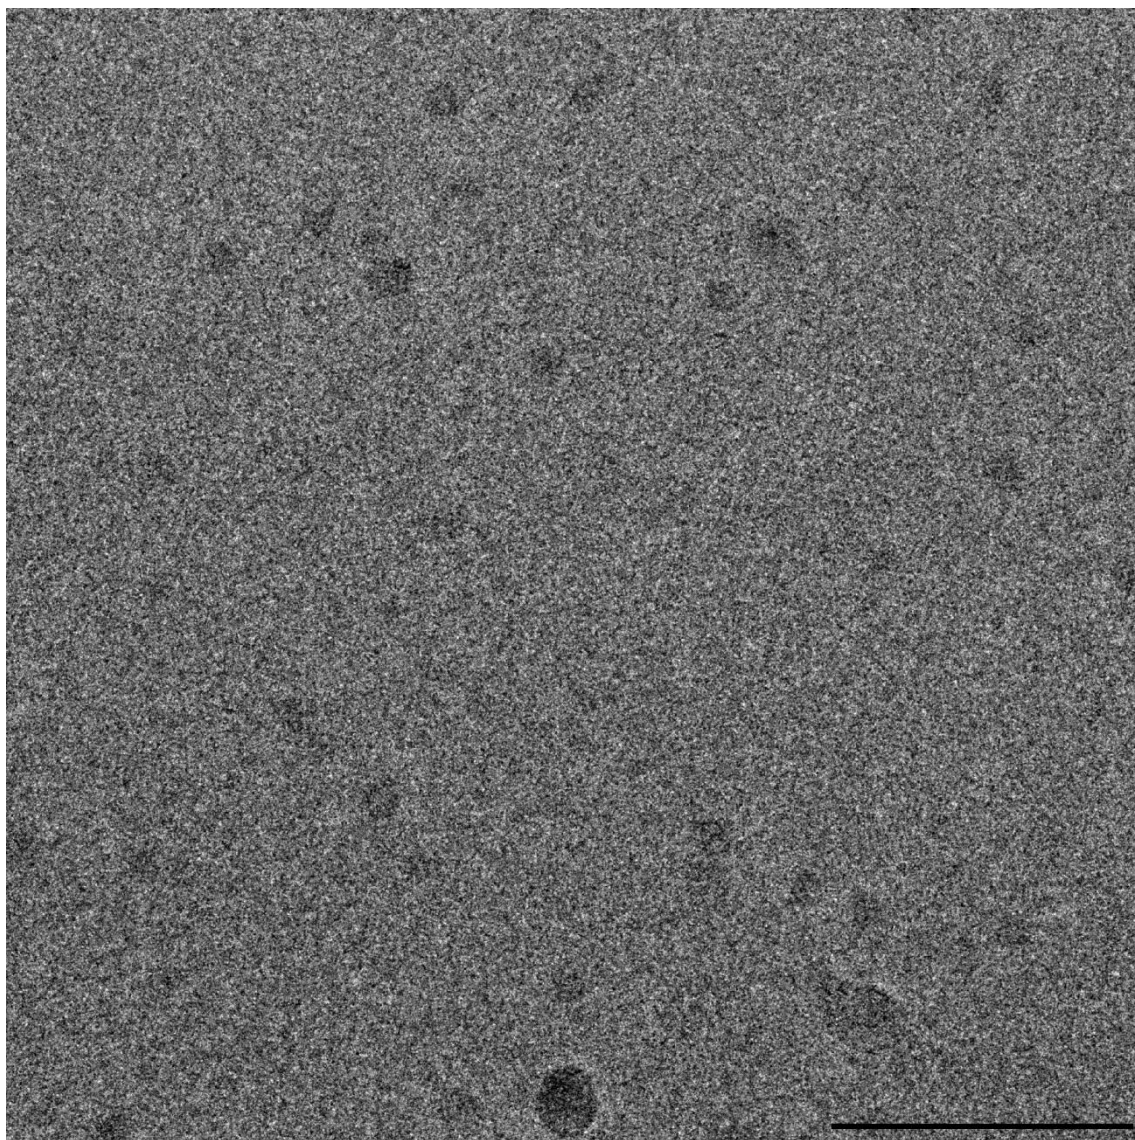

**Figure S5.** Cryo-TEM image of RIF-loaded NPs based on MPEO<sub>44</sub>-*b*-PCL<sub>18</sub> (**P1-RIF**). Scale bar: 100 nm.

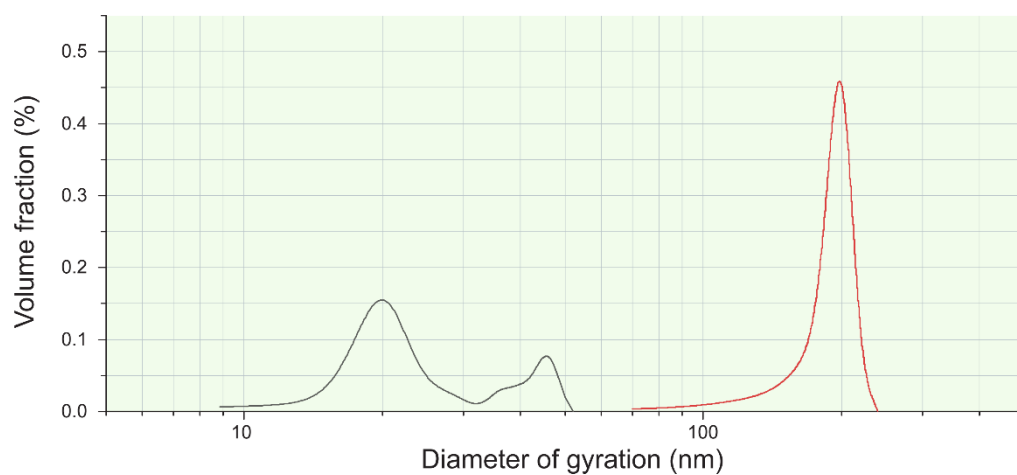

**Figure S6.** Comparison of volume weighted size distributions of nanoparticles measured with AFFFF method on the freshly prepared **P2** sample (MPEO<sub>44</sub>-*b*-PCL<sub>27</sub>, gray curve) and on the same sample after 2 months of aging (red curve).

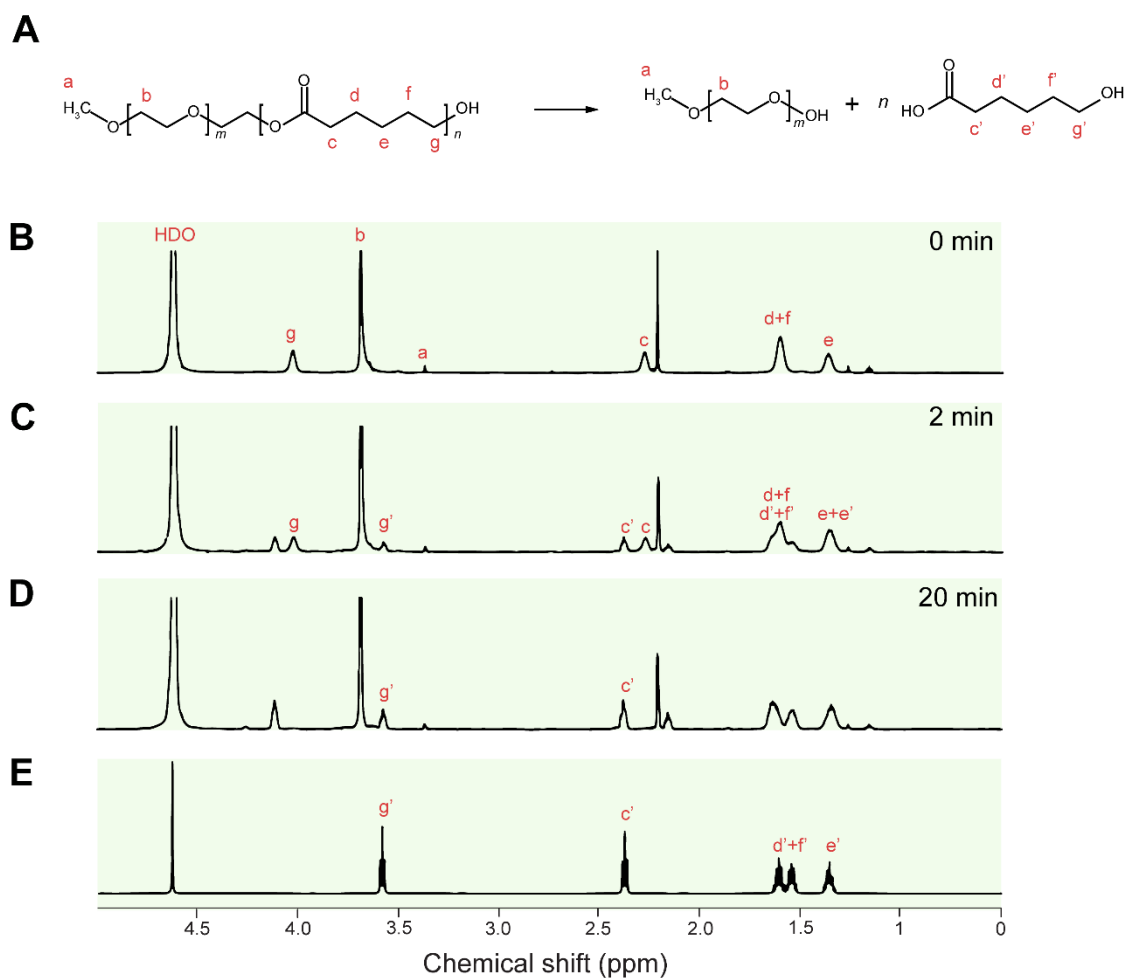

**Figure S7.**  $^1\text{H}$  NMR spectra measured in deuterated PBS at  $37^\circ\text{C}$ . **(A)** Reaction of lipase-catalyzed degradation of MPEO-*b*-PCL matrix. **(B)** MPEO<sub>44</sub>-*b*-PCL<sub>27</sub> NPs (**P2**) before lipase addition. **(C)** MPEO<sub>44</sub>-*b*-PCL<sub>27</sub> NPs (**P2**) after lipase addition (2 minutes). **(D)** MPEO<sub>44</sub>-*b*-PCL<sub>27</sub> NPs (**P2**) after lipase addition (20 minutes). **(E)** Neat 6-hydroxyhexanoic acid.

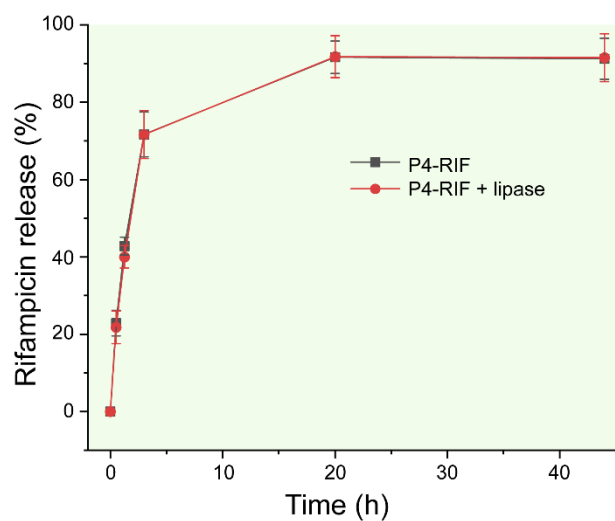

**Figure S8.** RIF release studied by a common dialysis-based method without and in the presence of bacterial lipase.

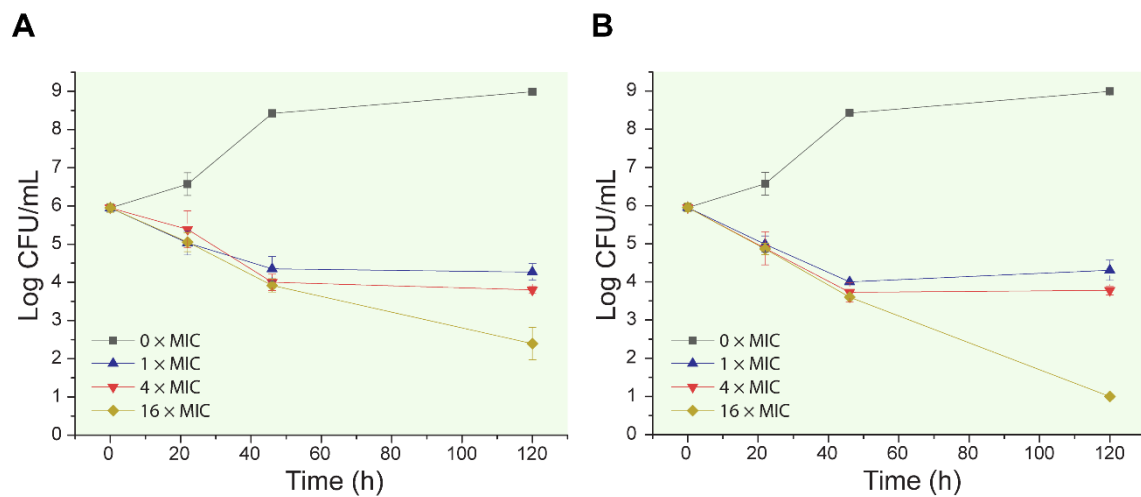

**Figure S9.** Time-kill curves of *M. fortuitum* exposed to both free RIF (**A**) and **P4**-based NPs loaded with RIF (**B**) in concentrations ranging from 1 × MIC to 16 × MIC estimated for the free RIF (i.e., 8 µg/mL).

**Table SII.** Cytotoxicity of RIF-loaded NPs in Raw 264.7 macrophages and ZF4 fibroblasts.

| <b>Formulation<br/>(Copolymer used)</b>                                | <b>Cytotoxicity estimated as IC<sub>50</sub> (µg/mL)</b> |                               |                               |
|------------------------------------------------------------------------|----------------------------------------------------------|-------------------------------|-------------------------------|
|                                                                        | <b>Raw 264.7 (24 h)<sup>a</sup></b>                      | <b>ZF4 (24 h)<sup>b</sup></b> | <b>ZF4 (48 h)<sup>c</sup></b> |
| <b>P1-RIF</b><br>(MPEO <sub>44</sub> - <i>b</i> -PCL <sub>18</sub> )   | 130.8 ± 4.1                                              | — <sup>d</sup>                | —                             |
| <b>P2-RIF</b><br>(MPEO <sub>44</sub> - <i>b</i> -PCL <sub>27</sub> )   | 110.1 ± 11.9                                             | —                             | —                             |
| <b>P3-RIF</b><br>(MPEO <sub>44</sub> - <i>b</i> -PCL <sub>81</sub> )   | 114.4 ± 12.6                                             | —                             | —                             |
| <b>P4-RIF</b><br>(MPEO <sub>113</sub> - <i>b</i> -PCL <sub>33</sub> )  | 91.0 ± 2.5                                               | 245.6 ± 17.1                  | 290.7 ± 24.3                  |
| <b>P5-RIF</b><br>(MPEO <sub>113</sub> - <i>b</i> -PCL <sub>113</sub> ) | 93.8 ± 6.6                                               | —                             | —                             |
| <b>RIF</b><br>(Free drug)                                              | 295.9 ± 0.7                                              | 881.4 ± 199.2                 | 391.3 ± 49.1                  |

<sup>a</sup> Raw 264.7 cells cytotoxicity detected by MTT assay after 24 h.<sup>a</sup> ZF4 cells cytotoxicity detected by MTT assay after 24 h.<sup>c</sup> ZF4 cells cytotoxicity detected by MTT assay after 48 h.<sup>d</sup> Not estimated.

**Table SIII.** Results from the bio-relevant characterization.

| <b>Formulation<br/>(Copolymer used)</b>                            | <b>Internalization<br/>half-live (min)</b> | <b>Intracellular degradation<br/>half-live (min)</b> |
|--------------------------------------------------------------------|--------------------------------------------|------------------------------------------------------|
| <b>P1</b><br>(MPEO <sub>44</sub> - <i>b</i> -PCL <sub>18</sub> )   | 21.0                                       | 51.6                                                 |
| <b>P2</b><br>(MPEO <sub>44</sub> - <i>b</i> -PCL <sub>27</sub> )   | 6.2                                        | 1,200                                                |
| <b>P3</b><br>(MPEO <sub>44</sub> - <i>b</i> -PCL <sub>81</sub> )   | 11.4                                       | 90.0                                                 |
| <b>P4</b><br>(MPEO <sub>113</sub> - <i>b</i> -PCL <sub>33</sub> )  | 2.4                                        | 1,200                                                |
| <b>P5</b><br>(MPEO <sub>113</sub> - <i>b</i> -PCL <sub>113</sub> ) | 9.4                                        | 91.2                                                 |

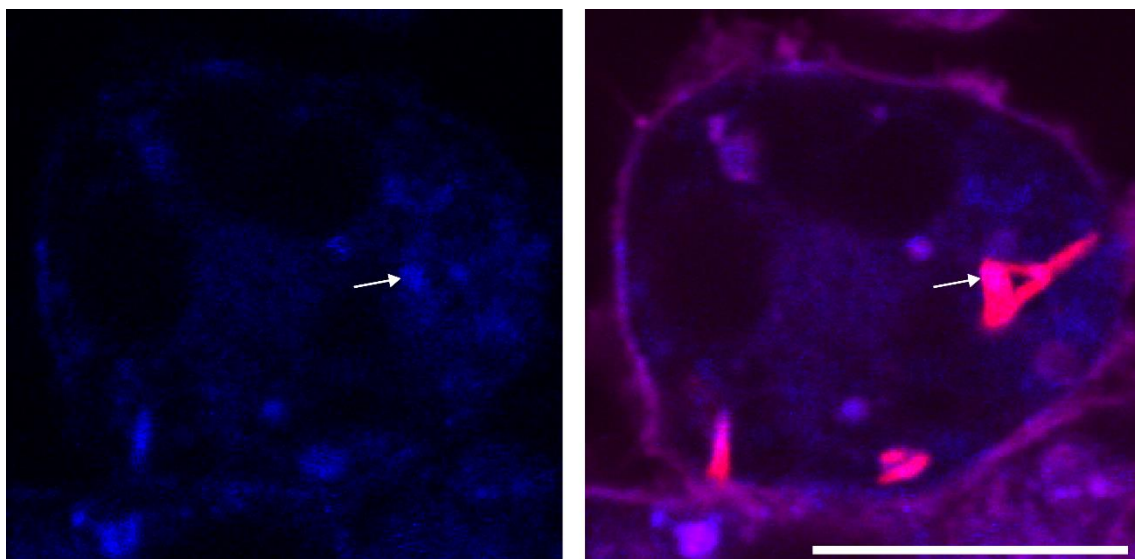

**Figure S10.** Image from confocal laser scanning microscopy of Raw 264.7 cells after infection by DsRed-expressing *M. bovis* BCG (red channel) and one day of treatment with MPEO<sub>113</sub>-*b*-PCL<sub>33</sub>-DACCA NPs (**P4**, blue channel). Note the increased NPs-related signal within the location of mycobacteria persistence (white arrows). Scale bar: 10  $\mu$ m.

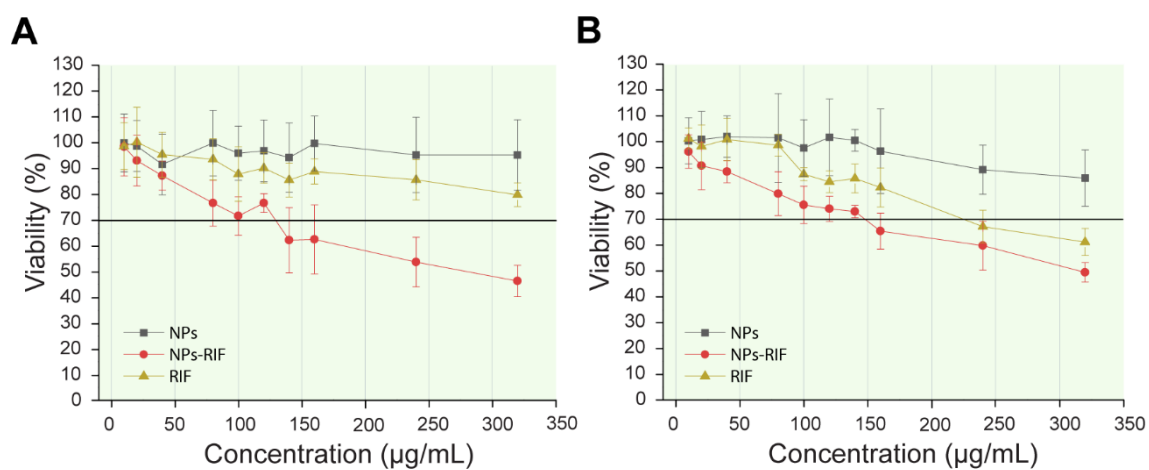

**Figure S11.** ZF4 cells viability detected by MTT assay. Cells were incubated with different concentrations of RIF-free MPEO<sub>113</sub>-*b*-PCL<sub>33</sub> (**P4**) NPs, RIF-loaded **P4** NPs (NPs-RIF) and free RIF for 24 h (**A**) and 48 h (**B**). The horizontal lines in the panels indicate a cell viability level where data above is considered non-cytotoxic and below cytotoxic.
